# Supplementary material for: A metal–organic framework based inner ear delivery system for the treatment of noise-induced hearing loss
Source: Royal Society of Chemistry journal article supplement (doi:10.1039/d0nr04860g), 2020-01-01
Supplement: d0nr04860g1.pdf [file d0nr04860g1.pdf]

## Electronic Supplementary Information

# A Metal-Organic Framework Based Inner Ear Delivery System for the Treatment of Noise-Induced Hearing Loss

Xiaoxiang Xu <sup>\*,1,†</sup>, Kun Lin <sup>2,†</sup>, Yanzhi Wang <sup>3,†</sup>, Kai Xu <sup>2</sup>, Yu Sun <sup>2</sup>, Xiuping Yang <sup>1</sup>, Minlan Yang <sup>1</sup>, Zuhong He <sup>2</sup>, Ya Zhang <sup>1</sup>, Haoquan Zheng <sup>\*,3</sup> and Xiong Chen <sup>\*,1</sup>

<sup>1</sup> Department of Otorhinolaryngology-Head and Neck Surgery, Zhongnan Hospital of Wuhan University, Wuhan, 430071, China.

<sup>2</sup> Department of Otolaryngology, Union Hospital, Tongji Medical College, Huazhong University of Science and Technology, Wuhan 430022, China.

<sup>3</sup> Key Laboratory of Applied Surface and Colloid Chemistry, Ministry of Education, School of Chemistry and Chemical Engineering, Shaanxi Normal University, Xi'an 710119, China.

†X. Xu, K. Lin and Y. Wang contributed equally to this work.

## **Section S1. Methods and experimental procedures**

### ***Synthesis of in vitro release of MP@ZIF-90***

In a typical experiment, 10 mg of MP@ZIF-90 was suspended in a 20.0 mL, pH 7.4 PBS at 37 °C for 7 days. Then, 0.5 M HCl was added to adjust the pH to 5. The release amount of each time point is operated by taking 0.5 mL of solution in tube and injected to RP-HPLC. The amount of MP was determined from the absorbance at 254 nm. The release percentages of MP were calculated by the equation: release percentage (%) =  $m(\text{MP}_{\text{released}})/m(\text{MP}_{\text{total}})$ .

### ***MTT assays in breast cancer cells***

MCF-7 cells were seeded into 96-well plates at  $1 \times 10^6$  cells per well. Then, these cells were cultured in media with 10% fetal calf serum. The ZIF-90, or ZIF-8 NPs were added at designed concentrations and incubated at 37 °C for 48 h. 10 mL of 3-(4,5-Dimethylthiazol-2-yl)-2,5-diphenyltetrazolium bromide (MTT) was added to each well. The cells were further incubated for 4 h. The medium was removed. Then, DMSO was added. The values were collected at 570 nm with a plate reader.

## Section S2. Characterization of the materials

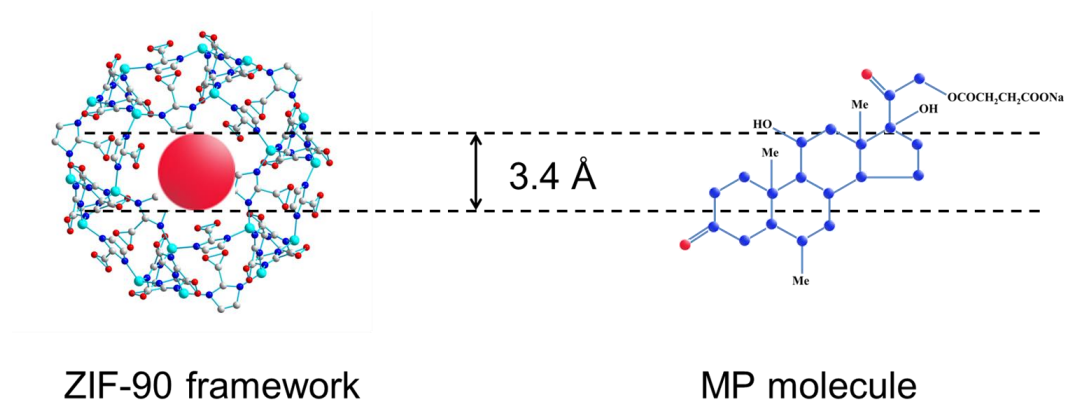

**Figure S1.** The comparison of the molecular size of MP molecule and the size of pore aperture of ZIF-90 framework.

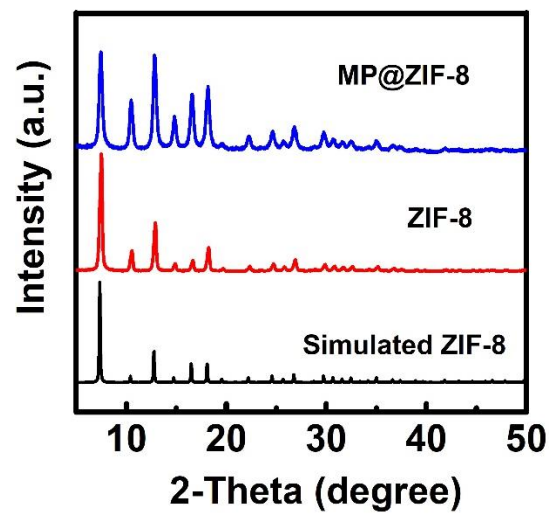

**Figure S2.** PXRD patterns of ZIF-8 and MP@ZIF-8.

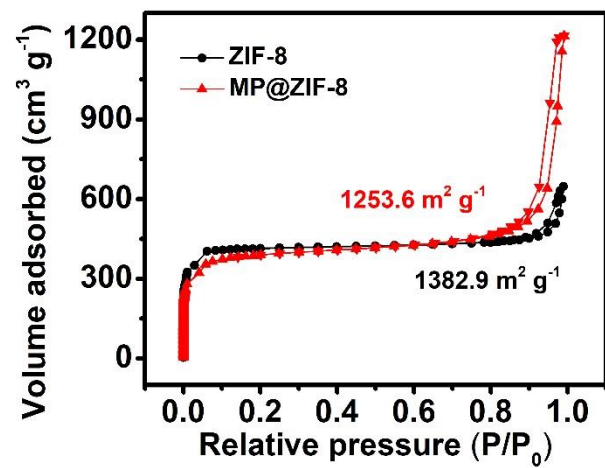

**Figure S3.** N<sub>2</sub> adsorption/desorption isotherms of ZIF-8 and MP@ZIF-8.

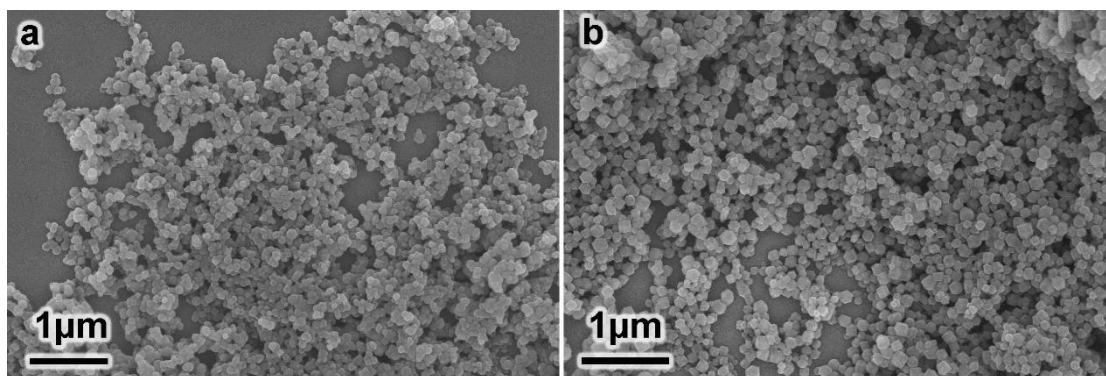

**Figure S4.** SEM images of FITC@ZIF-90 (a) and FITC@ZIF-8 (b).

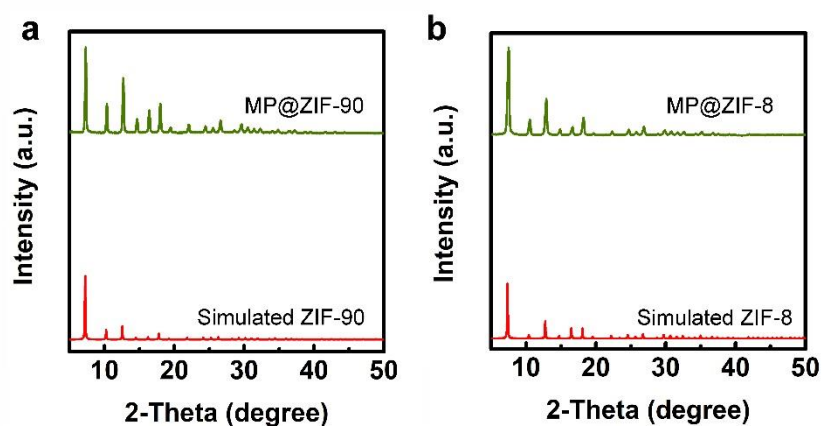

**Figure S5.** PXRD patterns of FITC@ZIF-90 (a) and FITC@ZIF-8 (b).
